# Supplementary material for: Genome-Wide Association of Genetic Variation in the PSCA Gene with Gastric Cancer Susceptibility in a Korean Population
Source: PubMed Central journal article supplement — Cancer Res Treat. 2018 Sep 5;51(2):748–57. doi: 10.4143/crt.2018.162 (PMC6473284; doi:10.4143/crt.2018.162), 2018-09-05
Supplement: crt-2018-162-suppl1.pdf [file crt-2018-162-suppl1.pdf]

(A)

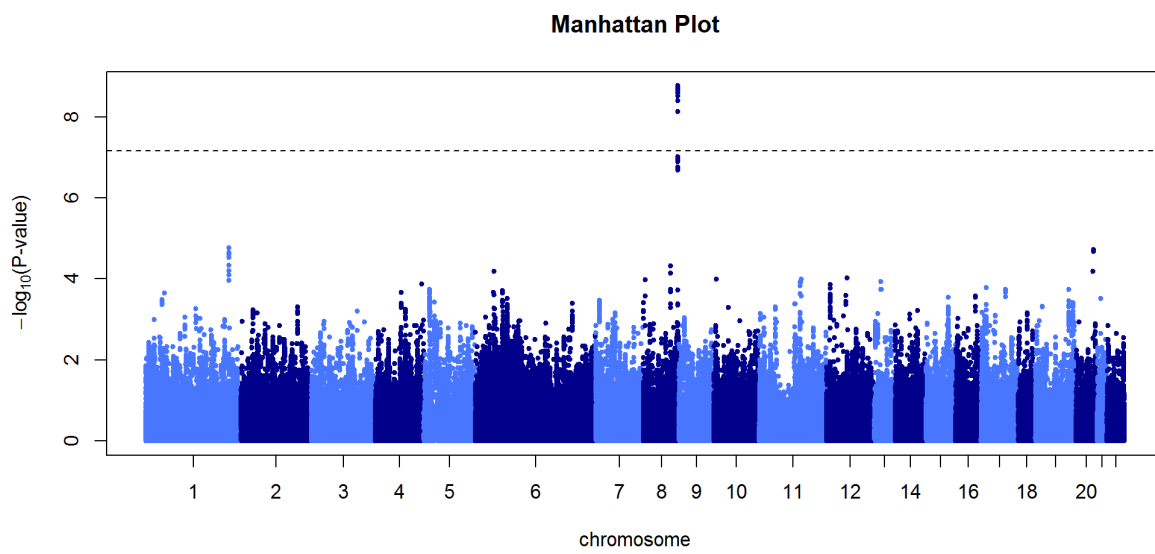

(B)

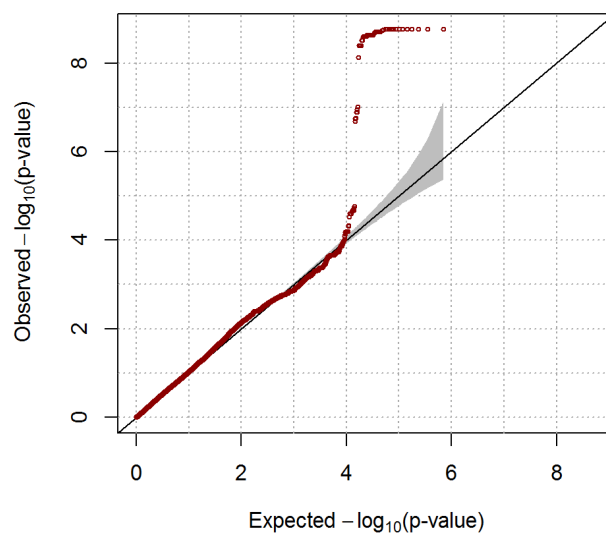

**S1 Fig.** Manhattan plot and QQ plot of subjects in discovery phase. (A) Manhattan plot of total subjects. (B) QQ plot of total subjects.
