# Supplementary material for: Genome-Wide Association of Genetic Variation in the PSCA Gene with Gastric Cancer Susceptibility in a Korean Population
Source: PubMed Central journal article supplement — Cancer Res Treat. 2018 Sep 5;51(2):748–57. doi: 10.4143/crt.2018.162 (PMC6473284; doi:10.4143/crt.2018.162), 2018-09-05
Supplement: crt-2018-162-suppl4.pdf [file crt-2018-162-suppl4.pdf]

**S4 Table.** Polymorphisms associated with gastric cancer susceptibility with p-value of  $<5 \times 10^{-5}$  in discovery phase and results of the validation phase and meta-analysis

| Character  |     |           |    | Phase I (GWAS phase) |              |                 |                  |          | Phase II (Validation phase) |              |                 |                  |          | Meta-analysis    |          |
|------------|-----|-----------|----|----------------------|--------------|-----------------|------------------|----------|-----------------------------|--------------|-----------------|------------------|----------|------------------|----------|
| SNP        | CHR | BP        | MA | No.                  | MAF in cases | MAF in controls | Odds ratio       | p-value  | No.                         | MAF in cases | MAF in controls | Odds ratio       | p-value  | Odds ratio       | p-value  |
| rs2976394  | 8   | 143763622 | C  | 1567                 | 0.40         | 0.52            | 0.62 (0.52-0.73) | 1.07E-08 | 4474                        | 0.43         | 0.50            | 0.75 (0.67-0.84) | 5.09E-07 | 0.7 (0.64-0.77)  | 1.66E-13 |
| rs10216533 | 8   | 143763690 | G  | 1583                 | 0.40         | 0.52            | 0.62 (0.53-0.73) | 1.22E-08 | 4489                        | 0.43         | 0.50            | 0.75 (0.67-0.84) | 5.48E-07 | 0.71 (0.64-0.77) | 1.92E-13 |
| rs1045547  | 8   | 143763757 | T  | 1583                 | 0.40         | 0.52            | 0.62 (0.53-0.73) | 1.22E-08 | 4489                        | 0.43         | 0.50            | 0.75 (0.67-0.84) | 5.48E-07 | 0.71 (0.64-0.77) | 1.92E-13 |
| rs1045605  | 8   | 143764101 | C  | 1583                 | 0.40         | 0.52            | 0.62 (0.53-0.73) | 1.22E-08 | 4489                        | 0.43         | 0.50            | 0.75 (0.67-0.84) | 5.48E-07 | 0.71 (0.64-0.77) | 1.92E-13 |
| rs2294010  | 8   | 143762430 | A  | 1583                 | 0.40         | 0.52            | 0.62 (0.53-0.73) | 1.22E-08 | 4489                        | 0.43         | 0.50            | 0.75 (0.67-0.84) | 5.48E-07 | 0.71 (0.64-0.77) | 1.92E-13 |
| rs2920296  | 8   | 143763109 | A  | 1583                 | 0.40         | 0.52            | 0.62 (0.53-0.73) | 1.22E-08 | 4489                        | 0.43         | 0.50            | 0.75 (0.67-0.84) | 5.48E-07 | 0.71 (0.64-0.77) | 1.92E-13 |
| rs2920297  | 8   | 143763083 | A  | 1583                 | 0.40         | 0.52            | 0.62 (0.53-0.73) | 1.22E-08 | 4489                        | 0.43         | 0.50            | 0.75 (0.67-0.84) | 5.48E-07 | 0.71 (0.64-0.77) | 1.92E-13 |
| rs2920298  | 8   | 143763043 | A  | 1583                 | 0.40         | 0.52            | 0.62 (0.53-0.73) | 1.22E-08 | 4489                        | 0.43         | 0.50            | 0.75 (0.67-0.84) | 5.48E-07 | 0.71 (0.64-0.77) | 1.92E-13 |
| rs2976392  | 8   | 143762932 | G  | 1583                 | 0.40         | 0.52            | 0.62 (0.53-0.73) | 1.22E-08 | 4489                        | 0.43         | 0.50            | 0.75 (0.67-0.84) | 5.48E-07 | 0.71 (0.64-0.77) | 1.92E-13 |
| rs2976393  | 8   | 143763618 | C  | 1583                 | 0.40         | 0.52            | 0.62 (0.53-0.73) | 1.22E-08 | 4489                        | 0.43         | 0.50            | 0.75 (0.67-0.84) | 5.48E-07 | 0.71 (0.64-0.77) | 1.92E-13 |
| rs2976395  | 8   | 143763750 | G  | 1583                 | 0.40         | 0.52            | 0.62 (0.53-0.73) | 1.22E-08 | 4489                        | 0.43         | 0.50            | 0.75 (0.67-0.84) | 5.48E-07 | 0.71 (0.64-0.77) | 1.92E-13 |
| rs2976396  | 8   | 143764001 | G  | 1583                 | 0.40         | 0.52            | 0.62 (0.53-0.73) | 1.22E-08 | 4492                        | 0.43         | 0.50            | 0.75 (0.67-0.84) | 8.75E-07 | 0.71 (0.64-0.78) | 3.38E-13 |
| rs2978982  | 8   | 143763490 | T  | 1583                 | 0.40         | 0.52            | 0.62 (0.53-0.73) | 1.22E-08 | 4489                        | 0.43         | 0.50            | 0.75 (0.67-0.84) | 5.48E-07 | 0.71 (0.64-0.77) | 1.92E-13 |
| rs1045574  | 8   | 143763958 | G  | 1582                 | 0.40         | 0.52            | 0.62 (0.53-0.73) | 1.24E-08 | 4492                        | 0.43         | 0.50            | 0.75 (0.67-0.84) | 4.80E-07 | 0.7 (0.64-0.77)  | 1.66E-13 |
| rs2294008  | 8   | 143761931 | C  | 1584                 | 0.40         | 0.52            | 0.62 (0.53-0.73) | 1.38E-08 | 4460                        | 0.43         | 0.50            | 0.75 (0.67-0.84) | 5.28E-07 | 0.7 (0.64-0.77)  | 1.94E-13 |
| rs2920279  | 8   | 143762135 | A  | 1584                 | 0.40         | 0.52            | 0.62 (0.53-0.73) | 1.38E-08 | 4469                        | 0.43         | 0.50            | 0.75 (0.67-0.84) | 7.25E-07 | 0.71 (0.64-0.78) | 2.86E-13 |
| rs2585179  | 8   | 143774193 | G  | 1564                 | 0.40         | 0.52            | 0.62 (0.52-0.73) | 1.39E-08 | 4453                        | 0.43         | 0.50            | 0.76 (0.67-0.85) | 1.25E-06 | 0.71 (0.65-0.78) | 5.78E-13 |
| rs1045531  | 8   | 143763547 | C  | 1578                 | 0.40         | 0.52            | 0.62 (0.53-0.73) | 1.46E-08 | 4483                        | 0.43         | 0.50            | 0.75 (0.67-0.84) | 6.05E-07 | 0.71 (0.64-0.78) | 2.46E-13 |
| rs2976389  | 8   | 143760421 | T  | 1560                 | 0.40         | 0.52            | 0.62 (0.53-0.73) | 1.62E-08 | 4403                        | 0.43         | 0.50            | 0.74 (0.66-0.83) | 2.49E-07 | 0.7 (0.64-0.77)  | 9.07E-14 |
| rs2920282  | 8   | 143757763 | T  | 1576                 | 0.40         | 0.52            | 0.62 (0.53-0.73) | 1.82E-08 | 4413                        | 0.43         | 0.50            | 0.75 (0.67-0.84) | 4.58E-07 | 0.7 (0.64-0.77)  | 1.99E-13 |
| rs2920283  | 8   | 143757037 | T  | 1576                 | 0.40         | 0.52            | 0.62 (0.53-0.73) | 1.82E-08 | 4413                        | 0.43         | 0.50            | 0.75 (0.67-0.84) | 4.69E-07 | 0.7 (0.64-0.77)  | 2.01E-13 |
| rs2976386  | 8   | 143757409 | G  | 1576                 | 0.40         | 0.52            | 0.62 (0.53-0.73) | 1.82E-08 | 4412                        | 0.43         | 0.50            | 0.75 (0.67-0.84) | 4.70E-07 | 0.7 (0.64-0.77)  | 2.04E-13 |
| rs2978979  | 8   | 143757286 | C  | 1576                 | 0.40         | 0.52            | 0.62 (0.53-0.73) | 1.82E-08 | 4412                        | 0.43         | 0.50            | 0.75 (0.67-0.84) | 4.70E-07 | 0.7 (0.64-0.77)  | 2.04E-13 |
| rs2978980  | 8   | 143757708 | T  | 1576                 | 0.40         | 0.52            | 0.62 (0.53-0.73) | 1.82E-08 | 4413                        | 0.43         | 0.50            | 0.75 (0.67-0.84) | 4.58E-07 | 0.7 (0.64-0.77)  | 1.99E-13 |
| rs2978981  | 8   | 143759137 | C  | 1576                 | 0.40         | 0.52            | 0.62 (0.53-0.73) | 1.82E-08 | 4415                        | 0.43         | 0.50            | 0.75 (0.67-0.84) | 4.87E-07 | 0.7 (0.64-0.77)  | 2.12E-13 |
| rs2920292  | 8   | 143765699 | A  | 1549                 | 0.40         | 0.52            | 0.62 (0.53-0.73) | 1.99E-08 | 4471                        | 0.43         | 0.50            | 0.75 (0.67-0.84) | 8.45E-07 | 0.71 (0.65-0.78) | 4.94E-13 |
| rs2920294  | 8   | 143765326 | C  | 1549                 | 0.40         | 0.52            | 0.62 (0.53-0.73) | 1.99E-08 | 4471                        | 0.43         | 0.50            | 0.75 (0.67-0.84) | 8.45E-07 | 0.71 (0.65-0.78) | 4.94E-13 |
| rs2920295  | 8   | 143764937 | A  | 1549                 | 0.40         | 0.52            | 0.62 (0.53-0.73) | 1.99E-08 | 4471                        | 0.43         | 0.50            | 0.75 (0.67-0.84) | 8.45E-07 | 0.71 (0.65-0.78) | 4.94E-13 |

|             |   |           |   |      |      |      |                  |          |      |      |      |                  |          |                  |          |
|-------------|---|-----------|---|------|------|------|------------------|----------|------|------|------|------------------|----------|------------------|----------|
| rs2976398   | 8 | 143764879 | G | 1549 | 0.40 | 0.52 | 0.62 (0.53-0.73) | 1.99E-08 | 4471 | 0.43 | 0.50 | 0.75 (0.67-0.84) | 8.45E-07 | 0.71 (0.65-0.78) | 4.94E-13 |
| rs2585181   | 8 | 143771714 | C | 1543 | 0.40 | 0.52 | 0.62 (0.53-0.73) | 2.03E-08 | 4434 | 0.44 | 0.50 | 0.76 (0.68-0.85) | 1.92E-06 | 0.71 (0.65-0.78) | 1.27E-12 |
| rs2717608   | 8 | 143771712 | A | 1543 | 0.40 | 0.52 | 0.62 (0.53-0.73) | 2.03E-08 | 4434 | 0.44 | 0.50 | 0.76 (0.68-0.85) | 1.92E-06 | 0.71 (0.65-0.78) | 1.27E-12 |
| rs13249440  | 8 | 143756892 | G | 1533 | 0.40 | 0.52 | 0.62 (0.52-0.73) | 2.11E-08 | 4381 | 0.43 | 0.50 | 0.75 (0.67-0.84) | 9.53E-07 | 0.71 (0.64-0.78) | 5.63E-13 |
| rs13256647  | 8 | 143756895 | C | 1533 | 0.40 | 0.52 | 0.62 (0.52-0.73) | 2.11E-08 | 4381 | 0.43 | 0.50 | 0.75 (0.67-0.84) | 9.53E-07 | 0.71 (0.64-0.78) | 5.63E-13 |
| rs34635647  | 8 | 143756890 | A | 1516 | 0.41 | 0.53 | 0.62 (0.52-0.73) | 2.13E-08 | 4349 | 0.44 | 0.50 | 0.75 (0.67-0.84) | 1.09E-06 | 0.71 (0.64-0.78) | 6.86E-13 |
| rs2572910   | 8 | 143770135 | C | 1531 | 0.41 | 0.52 | 0.62 (0.53-0.73) | 2.66E-08 | 4450 | 0.43 | 0.50 | 0.76 (0.67-0.85) | 1.16E-06 | 0.71 (0.65-0.78) | 9.20E-13 |
| rs2717562   | 8 | 143776668 | T | 1531 | 0.41 | 0.52 | 0.62 (0.53-0.73) | 2.66E-08 | 4433 | 0.43 | 0.50 | 0.76 (0.68-0.85) | 2.39E-06 | 0.71 (0.65-0.78) | 2.14E-12 |
| rs2920284   | 8 | 143756919 | A | 1544 | 0.40 | 0.52 | 0.63 (0.53-0.74) | 3.52E-08 | 4393 | 0.43 | 0.50 | 0.75 (0.67-0.84) | 7.82E-07 | 0.71 (0.64-0.78) | 6.41E-13 |
| rs2920285   | 8 | 143756218 | G | 1544 | 0.40 | 0.52 | 0.63 (0.53-0.74) | 3.52E-08 | 4392 | 0.43 | 0.50 | 0.75 (0.67-0.84) | 7.59E-07 | 0.71 (0.64-0.78) | 6.15E-13 |
| rs2920286   | 8 | 143754728 | G | 1544 | 0.40 | 0.52 | 0.63 (0.53-0.74) | 3.52E-08 | 4392 | 0.43 | 0.50 | 0.75 (0.67-0.84) | 7.33E-07 | 0.71 (0.64-0.78) | 5.92E-13 |
| rs2976385   | 8 | 143755426 | A | 1544 | 0.40 | 0.52 | 0.63 (0.53-0.74) | 3.52E-08 | 4392 | 0.43 | 0.50 | 0.75 (0.67-0.84) | 7.59E-07 | 0.71 (0.64-0.78) | 6.15E-13 |
| rs2978978   | 8 | 143756530 | T | 1544 | 0.40 | 0.52 | 0.63 (0.53-0.74) | 3.52E-08 | 4393 | 0.43 | 0.50 | 0.75 (0.67-0.84) | 7.82E-07 | 0.71 (0.64-0.78) | 6.41E-13 |
| rs2976384   | 8 | 143752994 | T | 1540 | 0.41 | 0.52 | 0.63 (0.53-0.75) | 7.01E-08 | 4403 | 0.44 | 0.50 | 0.75 (0.67-0.84) | 6.11E-07 | 0.71 (0.65-0.78) | 8.06E-13 |
| rs2976397   | 8 | 143764613 | T | 1578 | 0.48 | 0.37 | 1.52 (1.29-1.79) | 3.57E-07 | 4485 | 0.45 | 0.38 | 1.35 (1.21-1.51) | 1.58E-07 | 1.41 (1.28-1.54) | 5.53E-13 |
| rs2920281   | 8 | 143760444 | T | 1552 | 0.47 | 0.37 | 1.52 (1.29-1.79) | 3.97E-07 | 4407 | 0.45 | 0.38 | 1.36 (1.21-1.52) | 1.40E-07 | 1.41 (1.29-1.55) | 4.95E-13 |
| rs2920280   | 8 | 143761144 | C | 1576 | 0.48 | 0.37 | 1.52 (1.29-1.78) | 4.14E-07 | 4435 | 0.45 | 0.38 | 1.35 (1.21-1.51) | 2.48E-07 | 1.4 (1.28-1.54)  | 9.74E-13 |
| rs2976388   | 8 | 143760256 | A | 1576 | 0.48 | 0.37 | 1.52 (1.29-1.78) | 4.14E-07 | 4430 | 0.45 | 0.38 | 1.35 (1.21-1.51) | 2.47E-07 | 1.4 (1.28-1.54)  | 9.96E-13 |
| rs2976387   | 8 | 143759364 | A | 1568 | 0.47 | 0.37 | 1.51 (1.28-1.77) | 6.64E-07 | 4422 | 0.45 | 0.38 | 1.35 (1.2-1.51)  | 2.93E-07 | 1.4 (1.27-1.54)  | 1.74E-12 |
| rs2585183   | 8 | 143766059 | G | 1536 | 0.47 | 0.37 | 1.51 (1.28-1.78) | 7.26E-07 | 4454 | 0.45 | 0.38 | 1.35 (1.2-1.51)  | 2.79E-07 | 1.4 (1.27-1.53)  | 1.83E-12 |
| rs2978977   | 8 | 143755720 | A | 1512 | 0.47 | 0.36 | 1.51 (1.28-1.79) | 8.02E-07 | 4383 | 0.44 | 0.38 | 1.34 (1.19-1.5)  | 7.47E-07 | 1.39 (1.27-1.53) | 5.83E-12 |
| rs12025565  | 1 | 222148890 | A | 1530 | 0.32 | 0.25 | 1.45 (1.21-1.73) | 4.47E-05 | 4357 | 0.28 | 0.27 | 1.06 (0.93-1.2)  | 0.3841   | 1.17 (1.06-1.3)  | 0.002264 |
| rs371061408 | 1 | 222147550 | C | 1536 | 0.32 | 0.24 | 1.45 (1.21-1.73) | 4.63E-05 | 4353 | 0.28 | 0.27 | 1.06 (0.94-1.21) | 0.3283   | 1.18 (1.06-1.3)  | 0.001727 |

MA, minor allele; MAF, minor allele frequency.
