# Supplementary material for: Genome-Wide Association of Genetic Variation in the PSCA Gene with Gastric Cancer Susceptibility in a Korean Population
Source: PubMed Central journal article supplement — Cancer Res Treat. 2018 Sep 5;51(2):748–57. doi: 10.4143/crt.2018.162 (PMC6473284; doi:10.4143/crt.2018.162), 2018-09-05
Supplement: crt-2018-162-suppl5.pdf [file crt-2018-162-suppl5.pdf]

**S5 Table.** Polymorphisms associated with gastric cancer susceptibility with p-value  $<5 \times 10^{-5}$  in discovery phase and results of the validation phase and meta-analysis in male

| Character   |     |          |    |     | Phase I (GWAS phase) |                 |                  |          | Phase II (Validation phase) |              |                 |                  |         | Meta-analysis    |         |
|-------------|-----|----------|----|-----|----------------------|-----------------|------------------|----------|-----------------------------|--------------|-----------------|------------------|---------|------------------|---------|
| SNP         | CHR | BP       | MA | No. | MAF in cases         | MAF in controls | Odds ratio       | p-value  | No.                         | MAF in cases | MAF in controls | Odds ratio       | p-value | Odds ratio       | p-value |
| rs138056339 | 6   | 348125   | A  | 805 | 0.02                 | 0.06            | 0.2 (0.1-0.4)    | 4.68E-06 |                             |              |                 |                  |         |                  |         |
| rs6936644   | 6   | 28285175 | T  | 835 | 0.54                 | 0.42            | 1.57 (1.29-1.92) | 9.60E-06 | 2,177                       | 0.49         | 0.47            | 1.07 (0.93-1.24) | 0.3367  | 1.22 (1.09-1.37) | 0.0008  |
| rs9468334   | 6   | 28272948 | C  | 824 | 0.54                 | 0.43            | 1.58 (1.29-1.94) | 9.83E-06 | 2,178                       | 0.49         | 0.48            | 1.07 (0.93-1.24) | 0.3448  | 1.22 (1.08-1.37) | 0.0009  |
| rs200585917 | 16  | 49670325 | A  | 836 | 0.02                 | 0.06            | 0.21 (0.11-0.42) | 1.05E-05 |                             |              |                 |                  |         |                  |         |
| rs150166147 | 1   | 55337163 | A  | 811 | 0.02                 | 0.06            | 0.21 (0.11-0.42) | 1.09E-05 |                             |              |                 |                  |         |                  |         |
| rs117229601 | 9   | 1.35E+08 | C  | 836 | 0.01                 | 0.05            | 0.17 (0.07-0.37) | 1.21E-05 |                             |              |                 |                  |         |                  |         |
| rs137966407 | 6   | 1.42E+08 | A  | 802 | 0.02                 | 0.06            | 0.22 (0.11-0.43) | 1.50E-05 |                             |              |                 |                  |         |                  |         |
| rs7002225   | 8   | 1.28E+08 | G  | 836 | 0.45                 | 0.35            | 1.56 (1.27-1.91) | 1.66E-05 |                             |              |                 |                  |         |                  |         |
| rs1256531   | 14  | 65747759 | G  | 836 | 0.26                 | 0.17            | 1.72 (1.34-2.2)  | 1.86E-05 |                             |              |                 |                  |         |                  |         |
| rs201553091 | 5   | 1.41E+08 | A  | 792 | 0.02                 | 0.06            | 0.2 (0.1-0.43)   | 2.12E-05 |                             |              |                 |                  |         |                  |         |
| rs146873655 | 17  | 11622752 | A  | 836 | 0.02                 | 0.06            | 0.22 (0.11-0.45) | 2.17E-05 |                             |              |                 |                  |         |                  |         |
| rs149827217 | 1   | 1.61E+08 | T  | 836 | 0.02                 | 0.06            | 0.23 (0.11-0.45) | 2.58E-05 |                             |              |                 |                  |         |                  |         |
| rs7215433   | 17  | 48489042 | C  | 835 | 0.20                 | 0.29            | 0.59 (0.46-0.75) | 2.80E-05 | 2,176                       | 0.23         | 0.24            | 0.96 (0.82-1.14) | 0.6649  | 0.83 (0.73-0.95) | 0.0081  |
| rs12000     | 6   | 28227436 | G  | 836 | 0.53                 | 0.42            | 1.53 (1.26-1.87) | 2.83E-05 | 2,176                       | 0.48         | 0.47            | 1.05 (0.91-1.21) | 0.4977  | 1.19 (1.06-1.34) | 0.0030  |
| rs7218110   | 17  | 48493120 | C  | 832 | 0.20                 | 0.29            | 0.59 (0.46-0.75) | 3.01E-05 | 2,146                       | 0.22         | 0.24            | 0.92 (0.78-1.08) | 0.3068  | 0.8 (0.7-0.92)   | 0.0016  |
| rs141765602 | 16  | 814677   | A  | 836 | 0.02                 | 0.06            | 0.23 (0.12-0.46) | 3.05E-05 |                             |              |                 |                  |         |                  |         |
| rs9891288   | 17  | 48493888 | G  | 828 | 0.20                 | 0.29            | 0.59 (0.46-0.75) | 3.06E-05 | 2,138                       | 0.22         | 0.24            | 0.92 (0.77-1.08) | 0.3059  | 0.8 (0.69-0.92)  | 0.0015  |
| rs9891511   | 17  | 48493954 | G  | 828 | 0.20                 | 0.29            | 0.59 (0.46-0.75) | 3.06E-05 | 2,138                       | 0.22         | 0.24            | 0.92 (0.77-1.08) | 0.3059  | 0.8 (0.69-0.92)  | 0.0015  |
| rs11079914  | 17  | 48477246 | G  | 836 | 0.20                 | 0.29            | 0.59 (0.46-0.76) | 3.19E-05 | 2,176                       | 0.23         | 0.24            | 0.96 (0.82-1.14) | 0.6639  | 0.83 (0.73-0.95) | 0.0085  |
| rs1468317   | 17  | 48462239 | C  | 836 | 0.20                 | 0.29            | 0.59 (0.46-0.76) | 3.19E-05 | 2,176                       | 0.23         | 0.24            | 0.97 (0.82-1.14) | 0.6809  | 0.83 (0.73-0.96) | 0.0091  |
| rs2107572   | 17  | 48480802 | T  | 836 | 0.20                 | 0.29            | 0.59 (0.46-0.76) | 3.19E-05 | 2,177                       | 0.23         | 0.24            | 0.96 (0.82-1.13) | 0.6572  | 0.83 (0.73-0.95) | 0.0083  |
| rs2412315   | 17  | 48480097 | G  | 836 | 0.20                 | 0.29            | 0.59 (0.46-0.76) | 3.19E-05 | 2,176                       | 0.23         | 0.24            | 0.96 (0.82-1.14) | 0.6639  | 0.83 (0.73-0.95) | 0.0085  |
| rs2412318   | 17  | 48488114 | A  | 836 | 0.20                 | 0.29            | 0.59 (0.46-0.76) | 3.19E-05 | 2,176                       | 0.23         | 0.24            | 0.96 (0.82-1.13) | 0.6509  | 0.83 (0.73-0.95) | 0.0081  |
| rs3760407   | 17  | 48472270 | T  | 836 | 0.20                 | 0.29            | 0.59 (0.46-0.76) | 3.19E-05 | 2,177                       | 0.23         | 0.24            | 0.97 (0.82-1.14) | 0.6885  | 0.83 (0.73-0.96) | 0.0093  |
| rs3760413   | 17  | 48452776 | C  | 836 | 0.20                 | 0.29            | 0.59 (0.46-0.76) | 3.19E-05 | 2,173                       | 0.23         | 0.24            | 0.97 (0.82-1.14) | 0.7174  | 0.84 (0.73-0.96) | 0.0102  |
| rs4793653   | 17  | 48473551 | T  | 836 | 0.20                 | 0.29            | 0.59 (0.46-0.76) | 3.19E-05 | 2,177                       | 0.23         | 0.24            | 0.97 (0.82-1.14) | 0.6885  | 0.83 (0.73-0.96) | 0.0093  |
| rs6504652   | 17  | 48487622 | C  | 836 | 0.20                 | 0.29            | 0.59 (0.46-0.76) | 3.19E-05 | 2,176                       | 0.23         | 0.24            | 0.96 (0.82-1.13) | 0.6509  | 0.83 (0.73-0.95) | 0.0081  |
| rs7216828   | 17  | 48490416 | T  | 836 | 0.20                 | 0.29            | 0.59 (0.46-0.76) | 3.19E-05 | 2,177                       | 0.23         | 0.24            | 0.96 (0.82-1.13) | 0.6441  | 0.83 (0.73-0.95) | 0.0079  |
| rs7217960   | 17  | 48485147 | G  | 836 | 0.20                 | 0.29            | 0.59 (0.46-0.76) | 3.19E-05 | 2,176                       | 0.23         | 0.24            | 0.96 (0.82-1.13) | 0.6509  | 0.83 (0.73-0.95) | 0.0081  |
| rs917027    | 17  | 48470462 | C  | 836 | 0.20                 | 0.29            | 0.59 (0.46-0.76) | 3.19E-05 | 2,179                       | 0.23         | 0.24            | 0.96 (0.82-1.13) | 0.6456  | 0.83 (0.73-0.95) | 0.0081  |

|             |    |          |   |     |      |      |                  |          |       |      |      |                  |        |                  |        |
|-------------|----|----------|---|-----|------|------|------------------|----------|-------|------|------|------------------|--------|------------------|--------|
| rs74396937  | 11 | 51515640 | G | 836 | 0.08 | 0.14 | 0.49 (0.35-0.69) | 3.65E-05 | 2,178 | 0.25 | 0.26 | 0.92 (0.79-1.08) | 0.3150 | 0.82 (0.71-0.95) | 0.0079 |
| rs141506774 | 12 | 1.23E+08 | A | 836 | 0.02 | 0.06 | 0.24 (0.12-0.47) | 3.97E-05 |       |      |      |                  |        |                  |        |
| rs138505292 | 17 | 71334907 | T | 836 | 0.02 | 0.06 | 0.24 (0.12-0.47) | 4.04E-05 |       |      |      |                  |        |                  |        |
| rs3803800   | 17 | 7462969  | A | 836 | 0.41 | 0.31 | 1.55 (1.26-1.91) | 4.17E-05 |       |      |      |                  |        |                  |        |
| rs9303556   | 17 | 48448698 | G | 833 | 0.20 | 0.29 | 0.59 (0.46-0.76) | 4.60E-05 | 2,170 | 0.23 | 0.24 | 0.97 (0.82-1.14) | 0.7193 | 0.84 (0.73-0.96) | 0.0116 |
| rs146795873 | 7  | 1.01E+08 | G | 798 | 0.02 | 0.06 | 0.24 (0.12-0.47) | 4.98E-05 |       |      |      |                  |        |                  |        |

MA, minor allele; MAF, minor allele frequency.
