# Supplementary material for: Genome-Wide Association of Genetic Variation in the PSCA Gene with Gastric Cancer Susceptibility in a Korean Population
Source: PubMed Central journal article supplement — Cancer Res Treat. 2018 Sep 5;51(2):748–57. doi: 10.4143/crt.2018.162 (PMC6473284; doi:10.4143/crt.2018.162), 2018-09-05
Supplement: crt-2018-162-suppl7.pdf [file crt-2018-162-suppl7.pdf]

**S7 Table.** Polymorphisms associated with gastric cancer susceptibility with p-value  $<5 \times 10^{-5}$  conditioning on *PSCA* gene in discovery phase and results of the validation phase and meta-analysis

| Character   |     |           |    |       | Phase I (GWAS phase) |                 |                  |          | Phase II (Validation phase) |              |                 |                  | Meta-analysis |                  |         |
|-------------|-----|-----------|----|-------|----------------------|-----------------|------------------|----------|-----------------------------|--------------|-----------------|------------------|---------------|------------------|---------|
| SNP         | CHR | BP        | MA | No.   | MAF in cases         | MAF in controls | Odds ratio       | p-value  | No.                         | MAF in cases | MAF in controls | Odds ratio       | p-value       | Odds ratio       | p-value |
| rs371061408 | 1   | 222147550 | C  | 1,536 | 0.32                 | 0.24            | 1.46 (1.22-1.75) | 3.72E-05 | 4,350                       | 0.28         | 0.27            | 1.06 (0.94-1.21) | 0.3395        | 1.18 (1.06-1.31) | 0.0017  |
| rs12025565  | 1   | 222148890 | A  | 1,530 | 0.32                 | 0.25            | 1.46 (1.22-1.75) | 3.80E-05 | 4,354                       | 0.28         | 0.27            | 1.05 (0.93-1.20) | 0.3982        | 1.17 (1.06-1.30) | 0.0024  |
| rs12022676  | 1   | 222146085 | A  | 1,509 | 0.32                 | 0.24            | 1.46 (1.22-1.75) | 4.60E-05 | 4,354                       | 0.28         | 0.27            | 1.06 (0.93-1.20) | 0.3815        | 1.17 (1.06-1.30) | 0.0025  |
| rs12024555  | 1   | 222147845 | A  | 1,539 | 0.32                 | 0.24            | 1.45 (1.21-1.74) | 4.74E-05 | 4,353                       | 0.28         | 0.27            | 1.06 (0.94-1.20) | 0.3533        | 1.18 (1.06-1.30) | 0.0021  |
| rs12029332  | 1   | 222148822 | C  | 1,539 | 0.32                 | 0.24            | 1.45 (1.21-1.74) | 4.74E-05 | 4,355                       | 0.28         | 0.27            | 1.06 (0.93-1.20) | 0.3745        | 1.17 (1.06-1.30) | 0.0023  |
| rs12032598  | 1   | 222148552 | C  | 1,539 | 0.32                 | 0.24            | 1.45 (1.21-1.74) | 4.74E-05 | 4,354                       | 0.28         | 0.27            | 1.06 (0.93-1.20) | 0.3734        | 1.17 (1.06-1.30) | 0.0023  |
| rs12032715  | 1   | 222148971 | G  | 1,539 | 0.32                 | 0.24            | 1.45 (1.21-1.74) | 4.74E-05 | 4,356                       | 0.28         | 0.27            | 1.06 (0.93-1.20) | 0.3718        | 1.17 (1.06-1.30) | 0.0023  |
| rs149685934 | 1   | 222148219 | A  | 1,539 | 0.32                 | 0.24            | 1.45 (1.21-1.74) | 4.74E-05 | 4,354                       | 0.28         | 0.27            | 1.06 (0.93-1.20) | 0.3734        | 1.17 (1.06-1.30) | 0.0023  |

MA, minor allele; MAF, minor allele frequency.
