# Supplementary material for: Genome-Wide Association of Genetic Variation in the PSCA Gene with Gastric Cancer Susceptibility in a Korean Population
Source: PubMed Central journal article supplement — Cancer Res Treat. 2018 Sep 5;51(2):748–57. doi: 10.4143/crt.2018.162 (PMC6473284; doi:10.4143/crt.2018.162), 2018-09-05
Supplement: crt-2018-162-suppl8.pdf [file crt-2018-162-suppl8.pdf]

**S8 Table.** Polymorphisms associated with gastric cancer susceptibility with p-value of  $<5 \times 10^{-5}$  conditioning on *PSCA* gene in discovery phase and results of the validation phase and meta-analysis in male

| Character   |     |           |    | Phase I (GWAS phase) |              |                 |                  |         | Phase II (Validation phase) |              |                 |                  |         | Meta-analysis    |         |
|-------------|-----|-----------|----|----------------------|--------------|-----------------|------------------|---------|-----------------------------|--------------|-----------------|------------------|---------|------------------|---------|
| SNP         | CHR | BP        | MA | No.                  | MAF in cases | MAF in controls | Odds ratio       | p-value | No.                         | MAF in cases | MAF in controls | Odds ratio       | p-value | Odds ratio       | p-value |
| rs138056339 | 6   | 348125    | A  | 805                  | 0.04         | 0.04            | 0.21 (0.1-0.42)  | 9.4E-06 |                             |              |                 |                  |         |                  |         |
| rs117229601 | 9   | 135203882 | C  | 836                  | 0.02         | 0.02            | 0.17 (0.08-0.38) | 1.5E-05 |                             |              |                 |                  |         |                  |         |
| rs7002225   | 8   | 128428823 | G  | 836                  | 0.42         | 0.40            | 1.56 (1.27-1.92) | 1.8E-05 |                             |              |                 |                  |         |                  |         |
| rs6936644   | 6   | 28285175  | T  | 835                  | 0.48         | 0.49            | 1.56 (1.27-1.9)  | 1.8E-05 | 2,175                       | 0.44         | 0.48            | 1.07 (0.93-1.24) | 0.3231  | 1.22 (1.08-1.37) | 0.0010  |
| rs9468334   | 6   | 28272948  | C  | 824                  | 0.48         | 0.49            | 1.56 (1.27-1.91) | 2E-05   | 2,176                       | 0.45         | 0.48            | 1.07 (0.93-1.24) | 0.3331  | 1.21 (1.08-1.36) | 0.0012  |
| rs150166147 | 1   | 55337163  | A  | 811                  | 0.05         | 0.04            | 0.22 (0.11-0.45) | 2.6E-05 |                             |              |                 |                  |         |                  |         |
| rs200585917 | 16  | 49670325  | A  | 836                  | 0.04         | 0.04            | 0.23 (0.11-0.45) | 2.7E-05 |                             |              |                 |                  |         |                  |         |
| rs137966407 | 6   | 142468446 | A  | 802                  | 0.04         | 0.04            | 0.23 (0.11-0.46) | 3.5E-05 |                             |              |                 |                  |         |                  |         |
| rs7669841   | 4   | 106165743 | C  | 803                  | 0.30         | 0.30            | 1.58 (1.27-1.97) | 3.6E-05 | 2,169                       | 0.31         | 0.30            | 0.92 (0.79-1.07) | 0.2850  | 1.1 (0.97-1.24)  | 0.1405  |
| rs7215433   | 17  | 48489042  | C  | 835                  | 0.26         | 0.28            | 0.59 (0.46-0.76) | 3.8E-05 | 2,174                       | 0.25         | 0.26            | 0.95 (0.81-1.12) | 0.5488  | 0.83 (0.72-0.95) | 0.0060  |
| rs1256531   | 14  | 65747759  | G  | 836                  | 0.21         | 0.21            | 1.69 (1.31-2.17) | 4E-05   |                             |              |                 |                  |         |                  |         |
| rs3803800   | 17  | 7462969   | A  | 836                  | 0.37         | 0.34            | 1.55 (1.26-1.92) | 4.1E-05 |                             |              |                 |                  |         |                  |         |
| rs7218110   | 17  | 48493120  | C  | 832                  | 0.26         | 0.28            | 0.59 (0.46-0.76) | 4.2E-05 | 2,144                       | 0.25         | 0.25            | 0.9 (0.76-1.07)  | 0.2270  | 0.79 (0.69-0.91) | 0.0011  |
| rs11079914  | 17  | 48477246  | G  | 836                  | 0.26         | 0.28            | 0.59 (0.46-0.76) | 4.3E-05 | 2,174                       | 0.25         | 0.26            | 0.95 (0.81-1.12) | 0.5456  | 0.83 (0.72-0.95) | 0.0062  |
| rs1468317   | 17  | 48462239  | C  | 836                  | 0.26         | 0.28            | 0.59 (0.46-0.76) | 4.3E-05 | 2,174                       | 0.25         | 0.26            | 0.95 (0.81-1.12) | 0.5612  | 0.83 (0.72-0.95) | 0.0066  |
| rs2107572   | 17  | 48480802  | T  | 836                  | 0.26         | 0.28            | 0.59 (0.46-0.76) | 4.3E-05 | 2,175                       | 0.25         | 0.26            | 0.95 (0.81-1.12) | 0.5387  | 0.83 (0.72-0.95) | 0.0060  |
| rs2412315   | 17  | 48480097  | G  | 836                  | 0.26         | 0.28            | 0.59 (0.46-0.76) | 4.3E-05 | 2,174                       | 0.25         | 0.26            | 0.95 (0.81-1.12) | 0.5456  | 0.83 (0.72-0.95) | 0.0062  |
| rs2412318   | 17  | 48488114  | A  | 836                  | 0.26         | 0.28            | 0.59 (0.46-0.76) | 4.3E-05 | 2,174                       | 0.25         | 0.26            | 0.95 (0.81-1.12) | 0.5347  | 0.82 (0.72-0.95) | 0.0059  |
| rs3760407   | 17  | 48472270  | T  | 836                  | 0.26         | 0.28            | 0.59 (0.46-0.76) | 4.3E-05 | 2,175                       | 0.25         | 0.26            | 0.95 (0.81-1.12) | 0.5650  | 0.83 (0.72-0.95) | 0.0067  |
| rs3760413   | 17  | 48452776  | C  | 836                  | 0.26         | 0.28            | 0.59 (0.46-0.76) | 4.3E-05 | 2,171                       | 0.25         | 0.26            | 0.96 (0.81-1.13) | 0.5902  | 0.83 (0.72-0.95) | 0.0073  |
| rs4793653   | 17  | 48473551  | T  | 836                  | 0.26         | 0.28            | 0.59 (0.46-0.76) | 4.3E-05 | 2,175                       | 0.25         | 0.26            | 0.95 (0.81-1.12) | 0.5650  | 0.83 (0.72-0.95) | 0.0067  |
| rs6504652   | 17  | 48487622  | C  | 836                  | 0.26         | 0.28            | 0.59 (0.46-0.76) | 4.3E-05 | 2,174                       | 0.25         | 0.26            | 0.95 (0.81-1.12) | 0.5347  | 0.82 (0.72-0.95) | 0.0059  |
| rs7216828   | 17  | 48490416  | T  | 836                  | 0.26         | 0.28            | 0.59 (0.46-0.76) | 4.3E-05 | 2,175                       | 0.25         | 0.26            | 0.95 (0.81-1.12) | 0.5295  | 0.82 (0.72-0.95) | 0.0058  |
| rs7217960   | 17  | 48485147  | G  | 836                  | 0.26         | 0.28            | 0.59 (0.46-0.76) | 4.3E-05 | 2,174                       | 0.25         | 0.26            | 0.95 (0.81-1.12) | 0.5347  | 0.82 (0.72-0.95) | 0.0059  |
| rs917027    | 17  | 48470462  | C  | 836                  | 0.26         | 0.28            | 0.59 (0.46-0.76) | 4.3E-05 | 2,177                       | 0.25         | 0.26            | 0.95 (0.81-1.12) | 0.5229  | 0.82 (0.72-0.95) | 0.0057  |
| rs201553091 | 5   | 140719317 | A  | 792                  | 0.04         | 0.04            | 0.22 (0.1-0.45)  | 4.3E-05 |                             |              |                 |                  |         |                  |         |
| rs9891288   | 17  | 48493888  | G  | 828                  | 0.26         | 0.28            | 0.59 (0.46-0.76) | 4.3E-05 | 2,136                       | 0.25         | 0.25            | 0.9 (0.76-1.07)  | 0.2227  | 0.79 (0.69-0.91) | 0.0010  |
| rs9891511   | 17  | 48493954  | G  | 828                  | 0.26         | 0.28            | 0.59 (0.46-0.76) | 4.3E-05 | 2,136                       | 0.25         | 0.25            | 0.9 (0.76-1.07)  | 0.2227  | 0.79 (0.69-0.91) | 0.0010  |
| rs7663401   | 4   | 106128954 | T  | 792                  | 0.30         | 0.29            | 1.58 (1.27-1.98) | 4.6E-05 | 2,177                       | 0.31         | 0.30            | 0.93 (0.8-1.08)  | 0.3539  | 1.1 (0.97-1.25)  | 0.1237  |

|             |    |           |   |     |      |      |                  |         |       |      |      |                  |        |                  |        |  |
|-------------|----|-----------|---|-----|------|------|------------------|---------|-------|------|------|------------------|--------|------------------|--------|--|
| rs146873655 | 17 | 11622752  | A | 836 | 0.04 | 0.04 | 0.24 (0.12-0.48) | 4.8E-05 |       |      |      |                  |        |                  |        |  |
| rs149827217 | 1  | 161495065 | T | 836 | 0.04 | 0.04 | 0.24 (0.12-0.47) | 4.9E-05 |       |      |      |                  |        |                  |        |  |
| rs138056339 | 6  | 348125    | A | 805 | 0.04 | 0.04 | 0.21 (0.1-0.42)  | 9.4E-06 |       |      |      |                  |        |                  |        |  |
| rs117229601 | 9  | 135203882 | C | 836 | 0.02 | 0.02 | 0.17 (0.08-0.38) | 1.5E-05 |       |      |      |                  |        |                  |        |  |
| rs7002225   | 8  | 128428823 | G | 836 | 0.42 | 0.40 | 1.56 (1.27-1.92) | 1.8E-05 |       |      |      |                  |        |                  |        |  |
| rs6936644   | 6  | 28285175  | T | 835 | 0.48 | 0.49 | 1.56 (1.27-1.9)  | 1.8E-05 | 2,175 | 0.44 | 0.48 | 1.07 (0.93-1.24) | 0.3231 | 1.22 (1.08-1.37) | 0.0010 |  |
| rs9468334   | 6  | 28272948  | C | 824 | 0.48 | 0.49 | 1.56 (1.27-1.91) | 2E-05   | 2,176 | 0.45 | 0.48 | 1.07 (0.93-1.24) | 0.3331 | 1.21 (1.08-1.36) | 0.0012 |  |

MA, minor allele; MAF, minor allele frequency.
