# Supplementary material for: Genome-Wide Association of Genetic Variation in the PSCA Gene with Gastric Cancer Susceptibility in a Korean Population
Source: PubMed Central journal article supplement — Cancer Res Treat. 2018 Sep 5;51(2):748–57. doi: 10.4143/crt.2018.162 (PMC6473284; doi:10.4143/crt.2018.162), 2018-09-05
Supplement: crt-2018-162-suppl9.pdf [file crt-2018-162-suppl9.pdf]

**S9 Table.** Polymorphisms associated with gastric cancer susceptibility with p-value  $<5 \times 10^{-5}$  conditioning on *PSCA* gene in discovery phase and results of the validation phase and meta-analysis in female

| Character   |     |           |    | Phase I (GWAS phase) |              |                 |                  |          | Phase II (Validation phase) |              |                 |                  |         | Meta-analysis    |         |
|-------------|-----|-----------|----|----------------------|--------------|-----------------|------------------|----------|-----------------------------|--------------|-----------------|------------------|---------|------------------|---------|
| SNP         | CHR | BP        | MA | No.                  | MAF in cases | MAF in controls | Odds ratio       | p-value  | No.                         | MAF in cases | MAF in controls | Odds ratio       | p-value | Odds ratio       | p-value |
| rs12233126  | 2   | 100012200 | A  | 734                  | 0.38         | 0.27            | 1.77 (1.34-2.35) | 6.27E-05 | 2,311                       | 0.28         | 0.28            | 1.02 (0.83-1.26) | 0.8231  | 1.24 (1.05-1.46) | 0.0109  |
| rs28382949  | 2   | 100028112 | T  | 734                  | 0.38         | 0.27            | 1.77 (1.34-2.35) | 6.27E-05 | 2,312                       | 0.28         | 0.28            | 1.02 (0.83-1.26) | 0.8259  | 1.24 (1.05-1.46) | 0.0111  |
| rs72956387  | 2   | 100028890 | G  | 734                  | 0.38         | 0.27            | 1.77 (1.34-2.35) | 6.27E-05 | 2,312                       | 0.28         | 0.28            | 1.02 (0.83-1.26) | 0.8259  | 1.24 (1.05-1.46) | 0.0111  |
| rs11123785  | 2   | 100011675 | T  | 733                  | 0.38         | 0.27            | 1.77 (1.34-2.34) | 6.61E-05 | 2,311                       | 0.28         | 0.28            | 1.02 (0.83-1.26) | 0.8231  | 1.24 (1.05-1.46) | 0.0112  |
| rs2242036   | 2   | 100010685 | G  | 733                  | 0.38         | 0.27            | 1.77 (1.34-2.34) | 6.61E-05 | 2,312                       | 0.28         | 0.28            | 1.02 (0.83-1.26) | 0.8196  | 1.24 (1.05-1.46) | 0.0112  |
| rs111673703 | 11  | 130009474 | T  | 745                  | 0.11         | 0.05            | 2.49 (1.59-3.91) | 7.08E-05 | 2,294                       | 0.07         | 0.06            | 1.09 (0.75-1.59) | 0.6472  | 1.53 (1.15-2.05) | 0.0037  |
| rs1979687   | 11  | 11979674  | G  | 706                  | 0.29         | 0.43            | 0.57 (0.43-0.75) | 9.67E-05 | 2,312                       | 0.39         | 0.40            | 0.97 (0.8-1.17)  | 0.7303  | 0.82 (0.7-0.96)  | 0.0151  |
| rs10463885  | 5   | 130650168 | G  | 710                  | 0.06         | 0.02            | 4.17 (2.03-8.55) | 9.73E-05 | 2,244                       | 0.02         | 0.03            | 0.88 (0.48-1.6)  | 0.6665  | 1.68 (1.05-2.66) | 0.0289  |

MA, minor allele; MAF, minor allele frequency.
